# Supplementary material for: The Effect of Microbial Inoculum and Urea Supplements on Nutritive Value, Amino Acids Profile, Aerobic Stability and Digestibility of Wheat and Corn Silages
Source: MDPI journal article supplement (doi:10.3390/ani13132197), 2023-07-04
Supplement: s1 [file s1]

# Supplementary Materials:

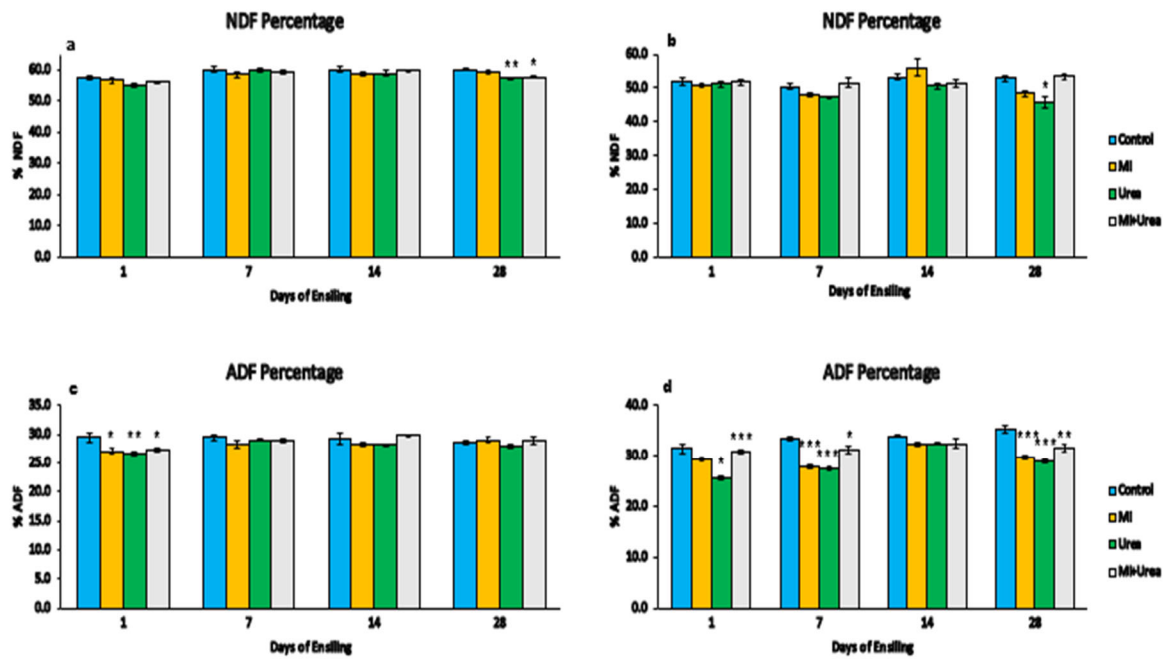

**Figure S1.** a. The NDF content of wheat silage with additives treatment at various days of ensiling; b. The NDF content of corn silage with additives treatment at various days of ensiling; c. The ADF content of wheat silage with additives treatment at various days of ensiling; d. The ADF content of corn silage with additives treatment at various days of ensiling. \*.05, \*\*.01 and \*\*\*.001 Statistical significance at  $P < 0.05$  after LSMeans Dunnett test.

**Table S 1.** The effect of additives and ensiling days on Hemicellulose content of wheat and corn silage

| Wheat silage |           |       |      |         |       |                                |        |         |
|--------------|-----------|-------|------|---------|-------|--------------------------------|--------|---------|
| Days         | Treatment |       |      |         | SEM   | Main Effect ( <i>P</i> -Value) |        |         |
|              | Control   | MI    | Urea | MI+Urea |       | Trt                            | Day    | Trt*Day |
| 1            | 29.4      | 29.5  | 28.5 | 28.9    | 0.258 | 0.0691                         | 0.0029 | 0.4047  |
| 7            | 29.5      | 30.2  | 31.0 | 30.4    | 0.233 |                                |        |         |
| 14           | 29.1      | 30.7  | 30.6 | 29.9    | 0.354 |                                |        |         |
| 28           | 28.6      | 30.0* | 29.4 | 28.9    | 0.205 |                                |        |         |

  

| Corn silage |           |        |        |         |       |                                |        |         |
|-------------|-----------|--------|--------|---------|-------|--------------------------------|--------|---------|
| Days        | Treatment |        |        |         | SEM   | Main Effect ( <i>P</i> -Value) |        |         |
|             | Control   | MI     | Urea   | MI+Urea |       | Trt                            | Day    | Trt*Day |
| 1           | 20.5      | 21.6   | 25.4** | 20.9    | 0.604 | 0.0063                         | <.0001 | 0.0001  |
| 7           | 16.9      | 20.2** | 20.0** | 20.1**  | 0.436 |                                |        |         |
| 14          | 19.3      | 23.8   | 18.2   | 19.1    | 0.816 |                                |        |         |
| 28          | 17.6      | 18.6   | 16.8   | 21.9    | 0.726 |                                |        |         |

\*0.05 and \*\*0.01: Statistical significance at  $p < 0.05$  after LSMeans Dunnett test, SEM: Standard error of the mean.

**Table S 2:** The effect of additives and ensiling days on DM content of wheat and corn silage

| Wheat silage |           |       |        |         |       |                                |        |         |
|--------------|-----------|-------|--------|---------|-------|--------------------------------|--------|---------|
| Days         | Treatment |       |        |         | SEM   | Main Effect ( <i>P</i> -Value) |        |         |
|              | Control   | MI    | Urea   | MI+Urea |       | Trt                            | Day    | Trt*Day |
| 1            | 43.8      | 45.0* | 45.4*  | 43.2    | 0.346 | <.0001                         | <.0001 | 0.0048  |
| 7            | 43.7      | 43.4  | 44.4   | 43.7    | 0.163 |                                |        |         |
| 14           | 43.9      | 43.0  | 44.6   | 43.4    | 0.279 |                                |        |         |
| 28           | 41.9      | 42.2  | 44.1** | 42.7    | 0.332 |                                |        |         |

  

| Corn silage |           |      |        |         |       |                                |        |         |
|-------------|-----------|------|--------|---------|-------|--------------------------------|--------|---------|
| Days        | Treatment |      |        |         | SEM   | Main Effect ( <i>P</i> -Value) |        |         |
|             | Control   | MI   | Urea   | MI+Urea |       | Trt                            | Day    | Trt*Day |
| 1           | 30.7      | 33.0 | 32.5   | 32.0    | 0.436 | <.0001                         | <.0001 | 0.0290  |
| 7           | 29.6      | 31.9 | 31.6   | 30.6    | 0.463 |                                |        |         |
| 14          | 28.7      | 29.3 | 31.7** | 30.8    | 0.500 |                                |        |         |
| 28          | 28.7      | 29.5 | 30.6*  | 31.0*   | 0.432 |                                |        |         |

\*0.05, and \*\*0.01: Statistical significance at  $p < 0.05$  after LSMeans Dunnett test, SEM: Standard error of the mean.
